# Supplementary material for: Impact of vaccination on COVID-19-associated admissions to critical care in England: a population cohort study of linked data
Source: bioRxiv or medRxiv preprint supplement (doi:10.1101/2022.10.03.22280649), 2022-10-04
Supplement: Supplementary file [file media-1.pdf]

# Impact of vaccination on COVID-19-associated admissions to critical care in England: a population cohort study of linked data

## Supplementary appendix

David A Harrison, Peter J Watkinson, James C Doidge, Manu Shankar-Hari, Paul R Mouncey, Martina Patone, Carol A C Coupland, Julia Hippisley-Cox, Kathryn M Rowan

### Contents

|                                                                                                                                                       |   |
|-------------------------------------------------------------------------------------------------------------------------------------------------------|---|
| Figure S1. Rate of admission to critical care over time .....                                                                                         | 2 |
| Figure S2. Rate of admission to critical care by age group over time .....                                                                            | 3 |
| Figure S3. Rate of admission to critical care by age group and vaccination status over time – sensitivity analysis.....                               | 4 |
| Figure S4. Percentage reduction in rate of admission to critical care associated with vaccination by age group over time – sensitivity analysis ..... | 5 |

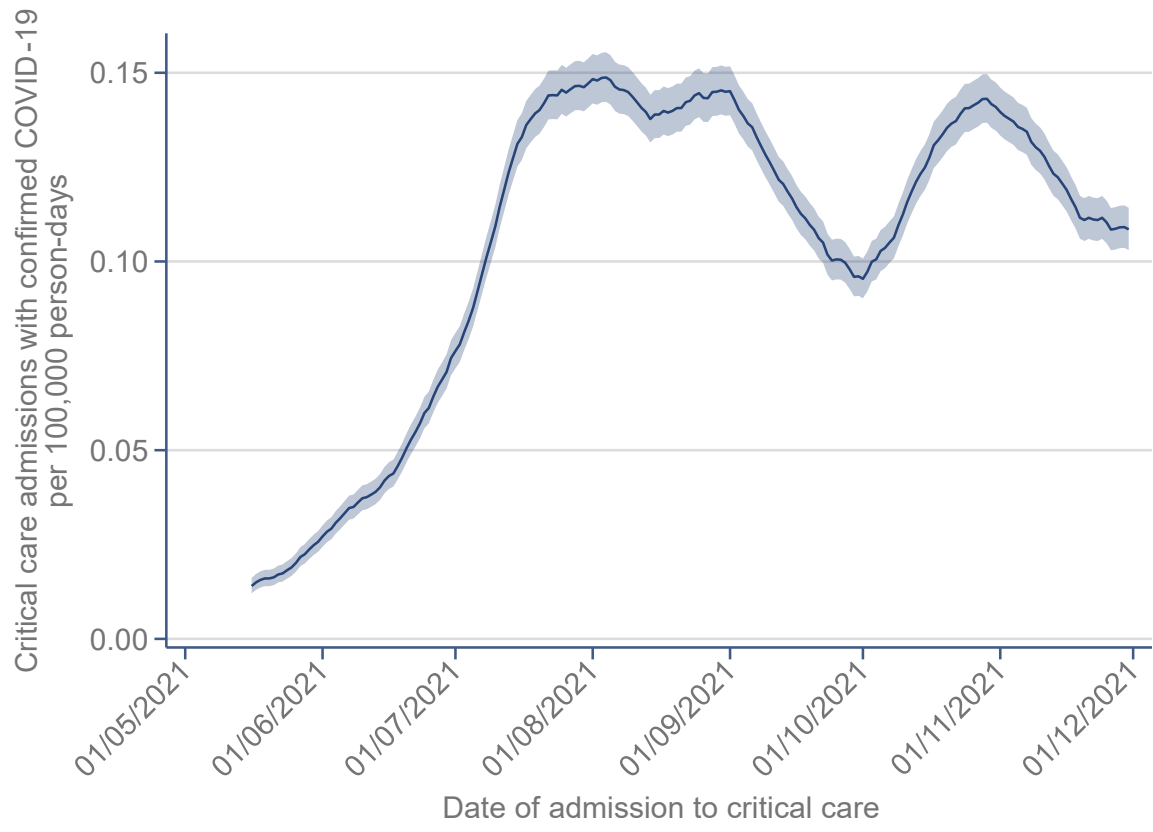

**Figure S1. Rate of admission to critical care over time**  
30-day moving average.

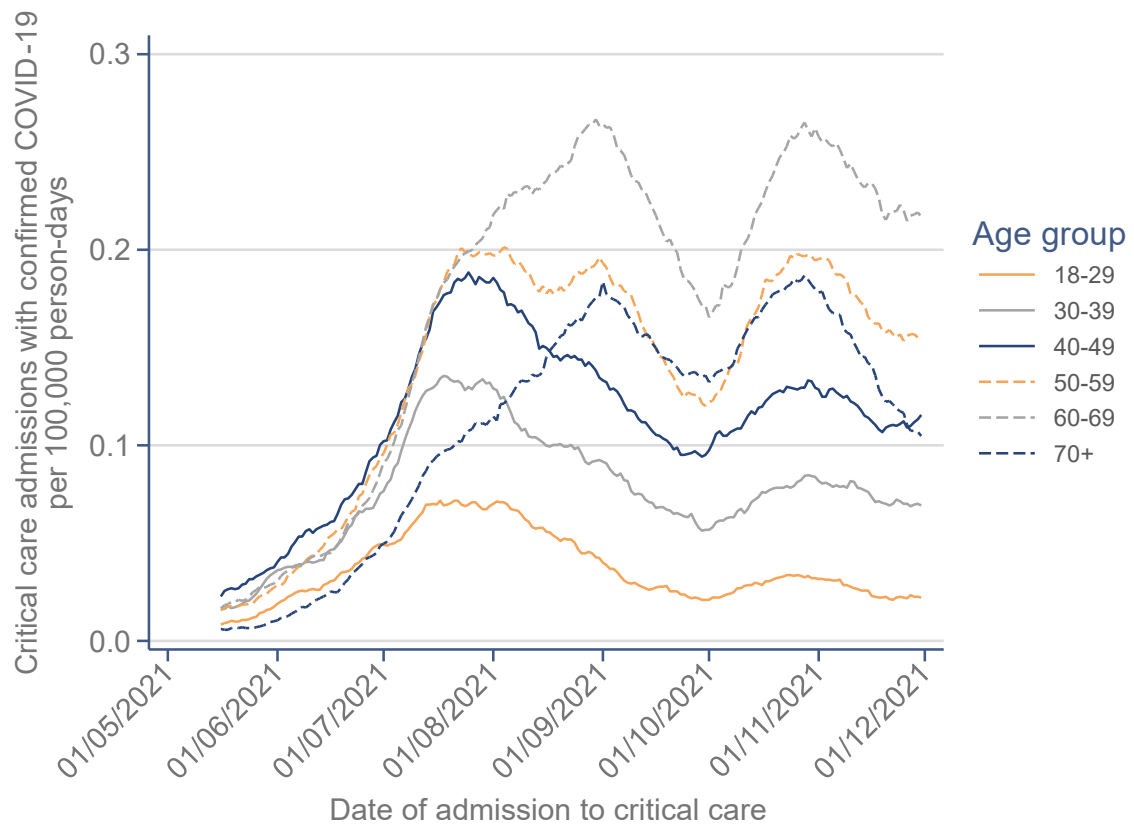

**Figure S2. Rate of admission to critical care by age group over time**  
30-day moving average.

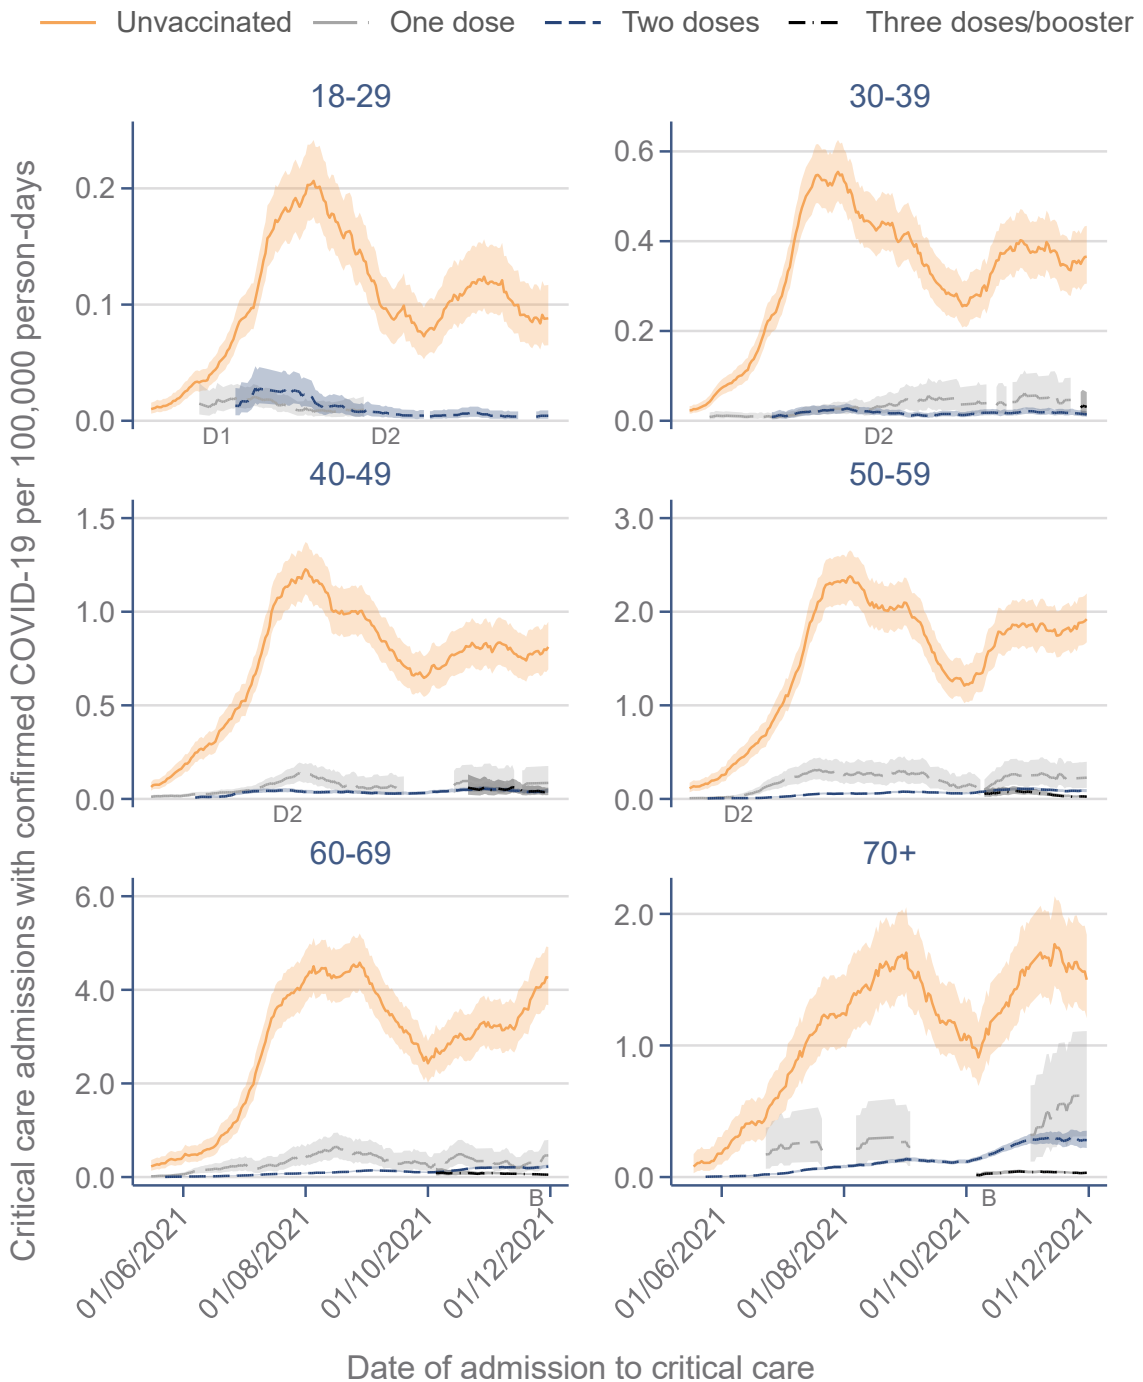

**Figure S3. Rate of admission to critical care by age group and vaccination status over time – sensitivity analysis**

Vaccination status assessed on the date of the positive SARS-CoV-2 test. 30-day moving average. D1=date on which dose 1 of vaccine was offered to all people within the age group (predates the analysis time period for age groups of 30 years and over). D2=date on which dose 2 of the vaccine was offered to all people within the age group (predates the analysis time period for age groups of 60 years and over). B=date on which booster dose was offered to all people within the age group (after the analysis time period for age groups under 60 years).

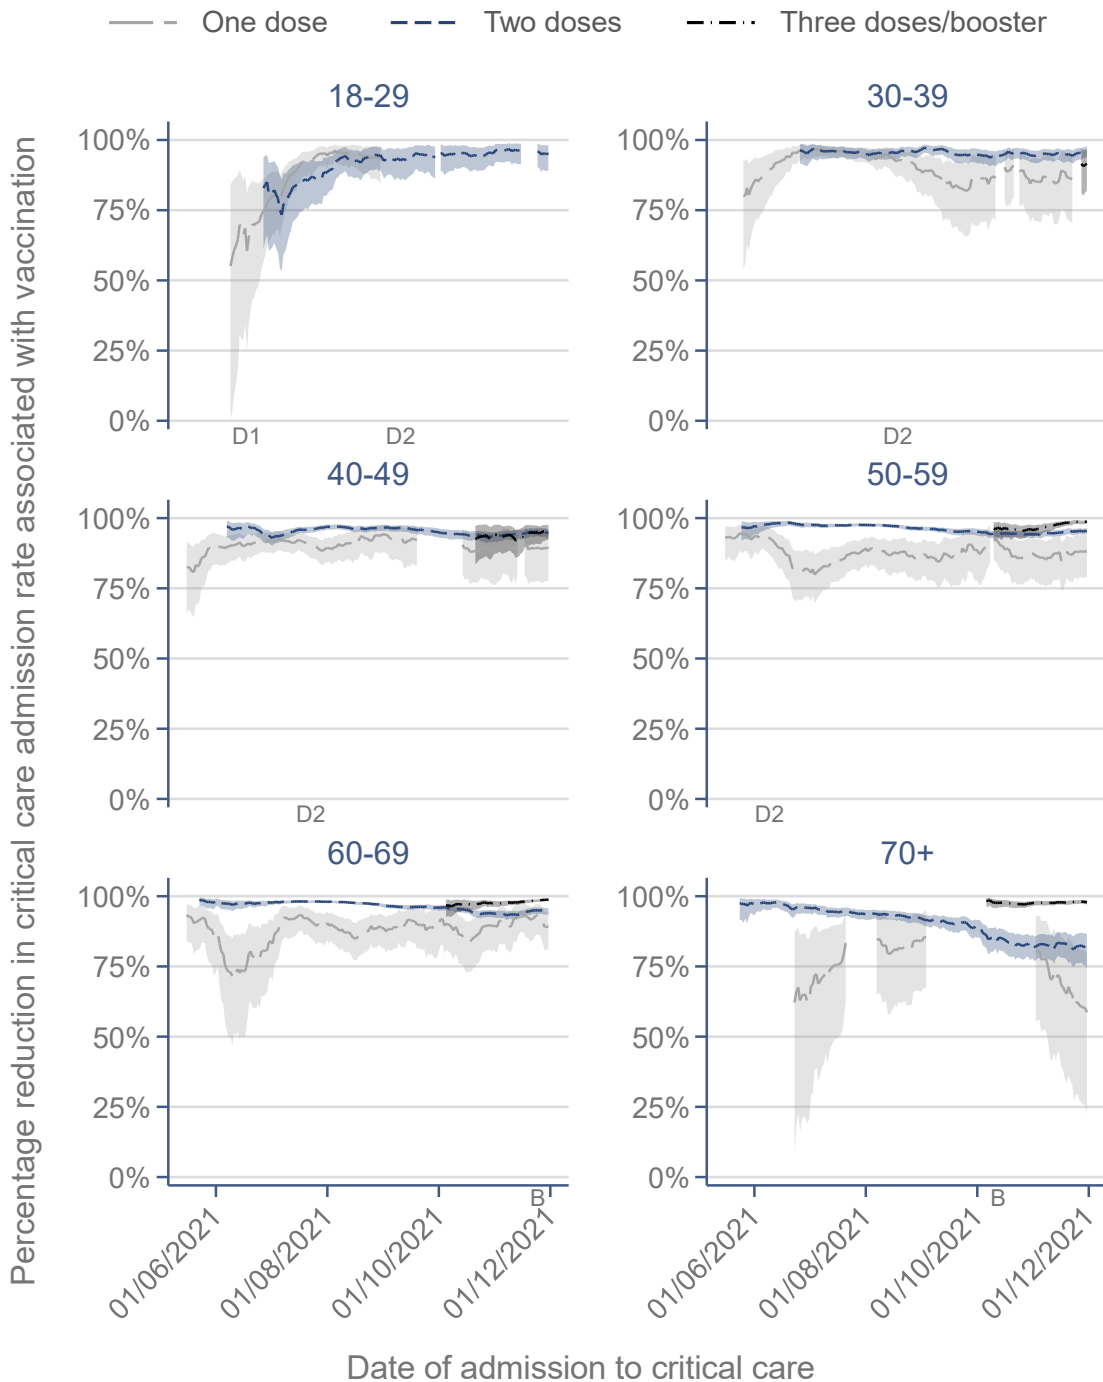

**Figure S4. Percentage reduction in rate of admission to critical care associated with vaccination by age group over time – sensitivity analysis**

Vaccination status assessed on the date of the positive SARS-CoV-2 test. 30-day moving average. D1=date on which dose 1 of vaccine was offered to all people within the age group (predates the analysis time period for age groups of 30 years and over). D2=date on which dose 2 of the vaccine was offered to all people within the age group (predates the analysis time period for age groups of 60 years and over). B=date on which booster dose was offered to all people within the age group (after the analysis time period for age groups under 60 years).
